# Supplementary material
Source: publisher figshare collection journal article supplement (https://tandf.figshare.com/ndownloader/files/31079772)
Supplement: Supplementary file 3 [file 31079772]

**Figure S5.**

**A**

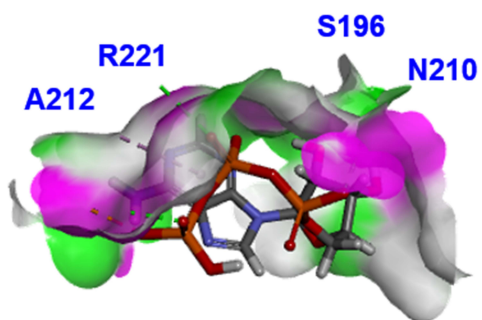

H-Bonds  
Donor  
Acceptor

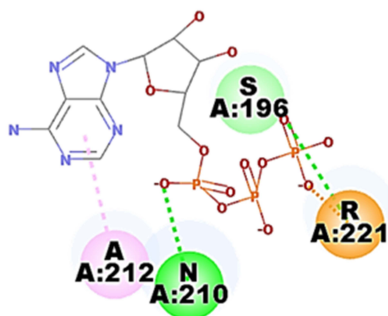

**Interactions**

- van der Waals
- Salt Bridge
- Conventional Hydrogen Bond
- Pi-Alkyl

**B**

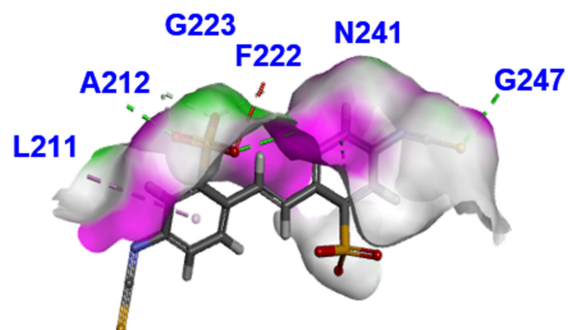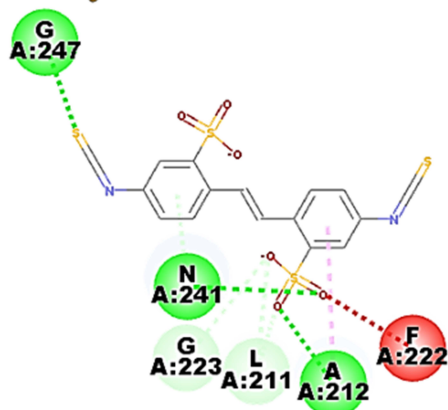

**Interactions**

- Conventional Hydrogen Bond
- Carbon Hydrogen Bond
- Unfavorable Acceptor-Acceptor
- Pi-Donor Hydrogen Bond
- Pi-Alkyl
