# Supplementary material
Source: publisher figshare collection journal article supplement (https://tandf.figshare.com/ndownloader/files/31079772)

Figure S4.

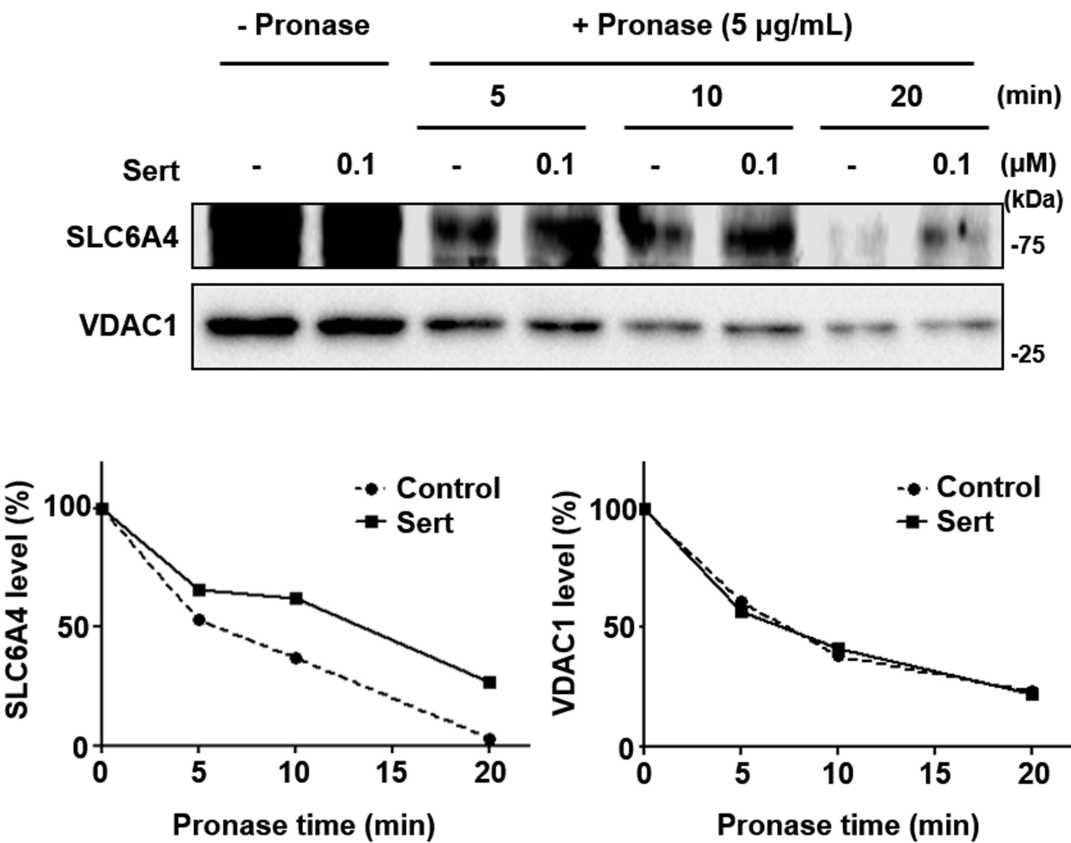

Supplement: Supplementary file 1 [file 31079772]

Figure S6.

A

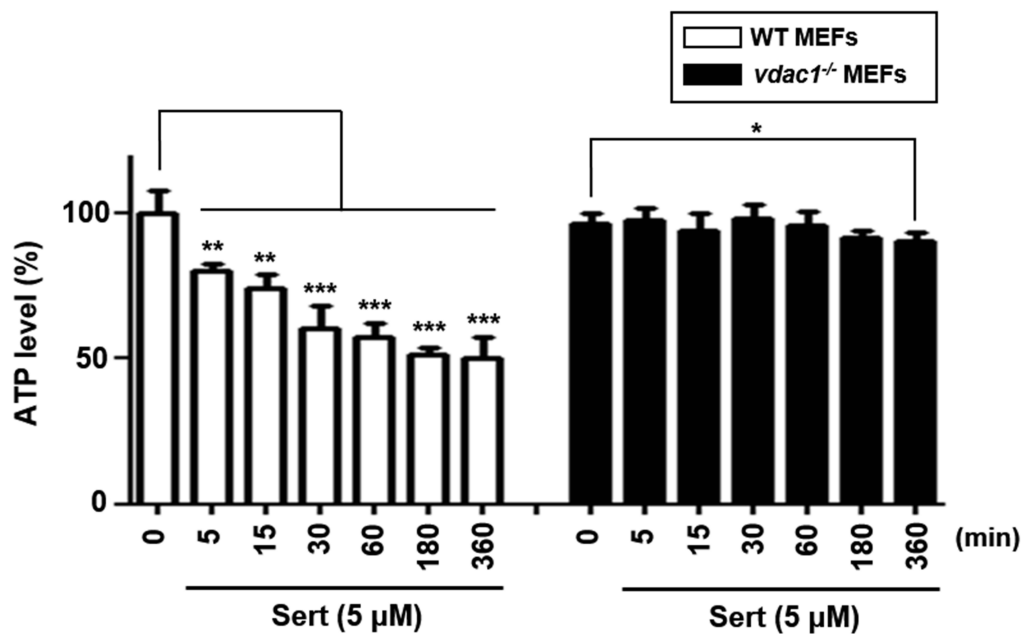

B

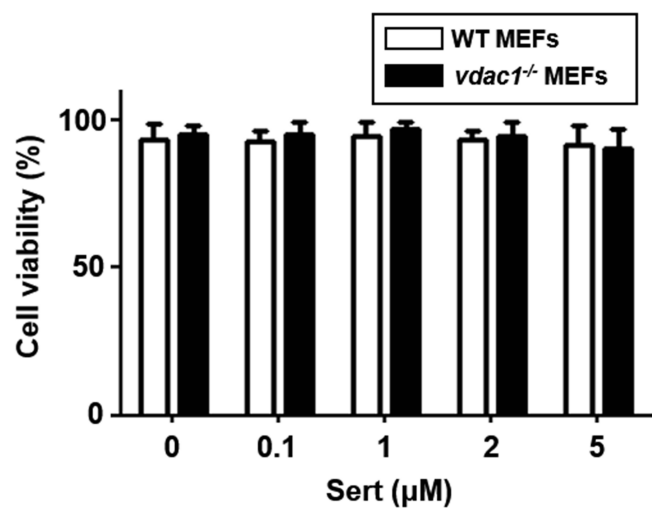

Supplement: Supplementary file 2 [file 31079772]

**Figure S3.**

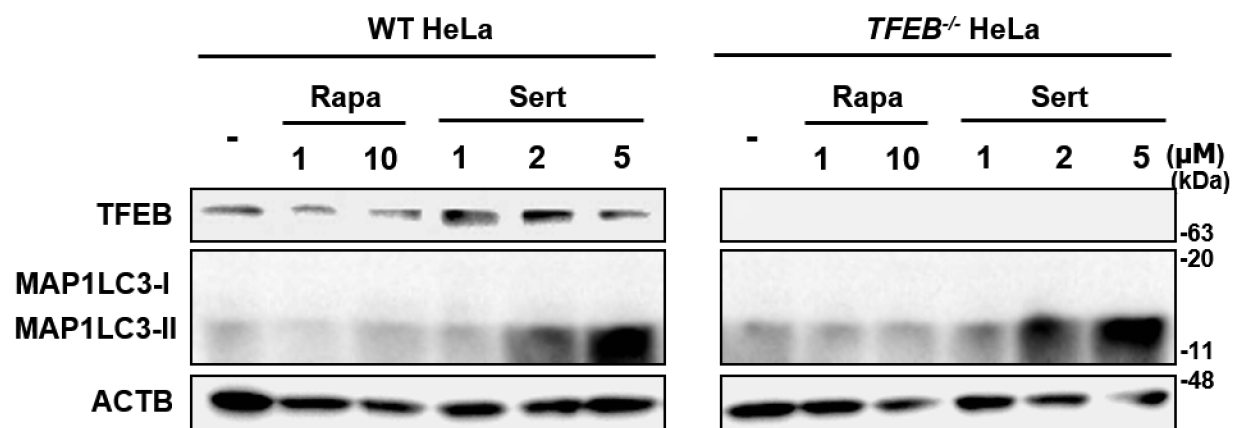

Supplement: Supplementary file 4 [file 31079772]

Figure S1.

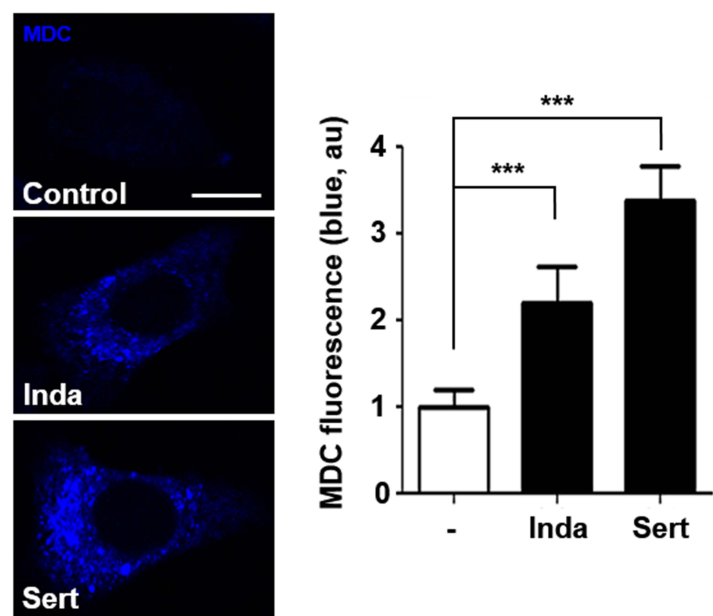

Supplement: Supplementary file 5 [file 31079772]

Figure S2.

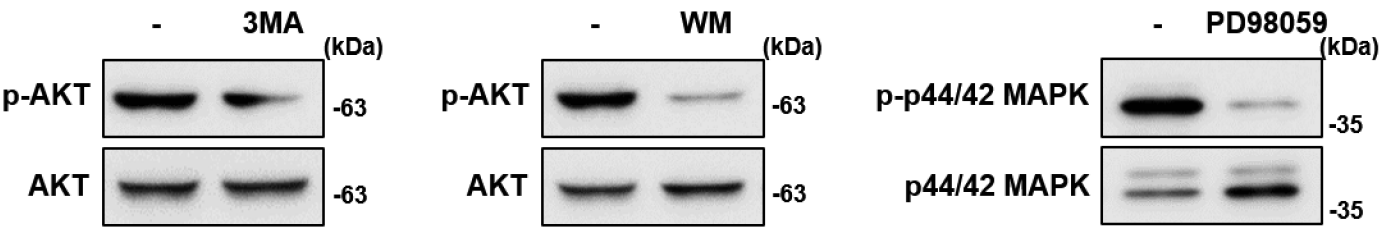

Supplement: Supplementary file 6 [file 31079772]

Figure S7.

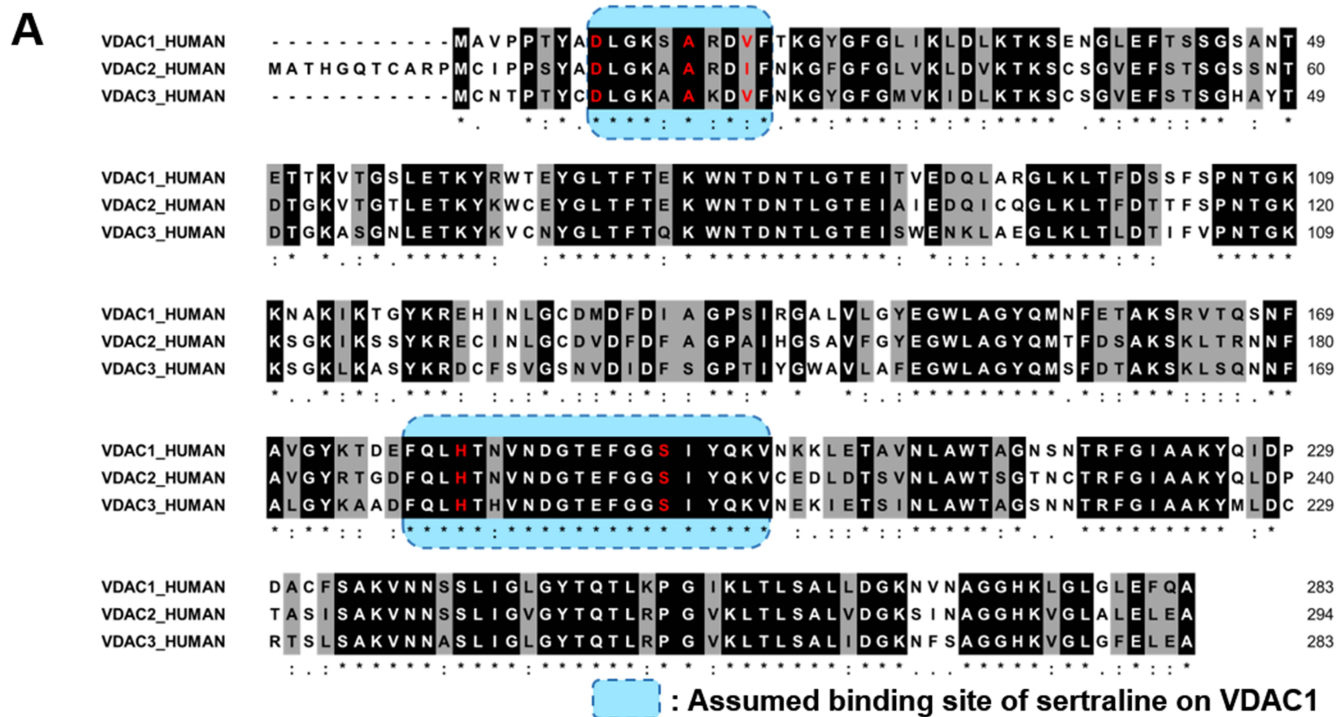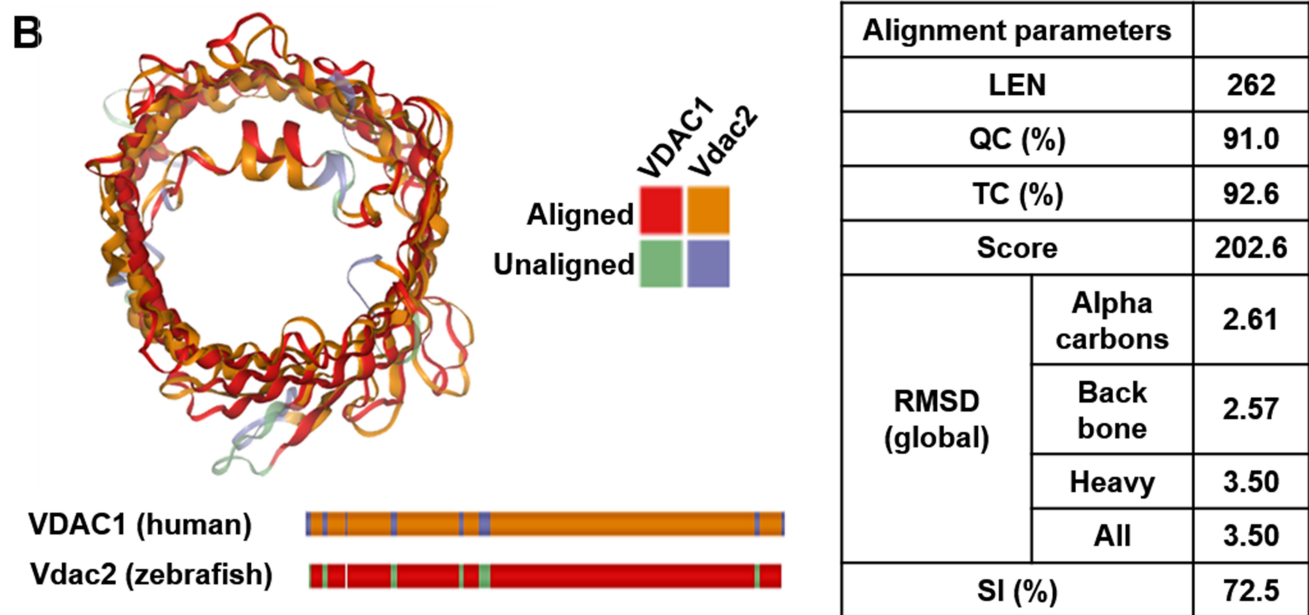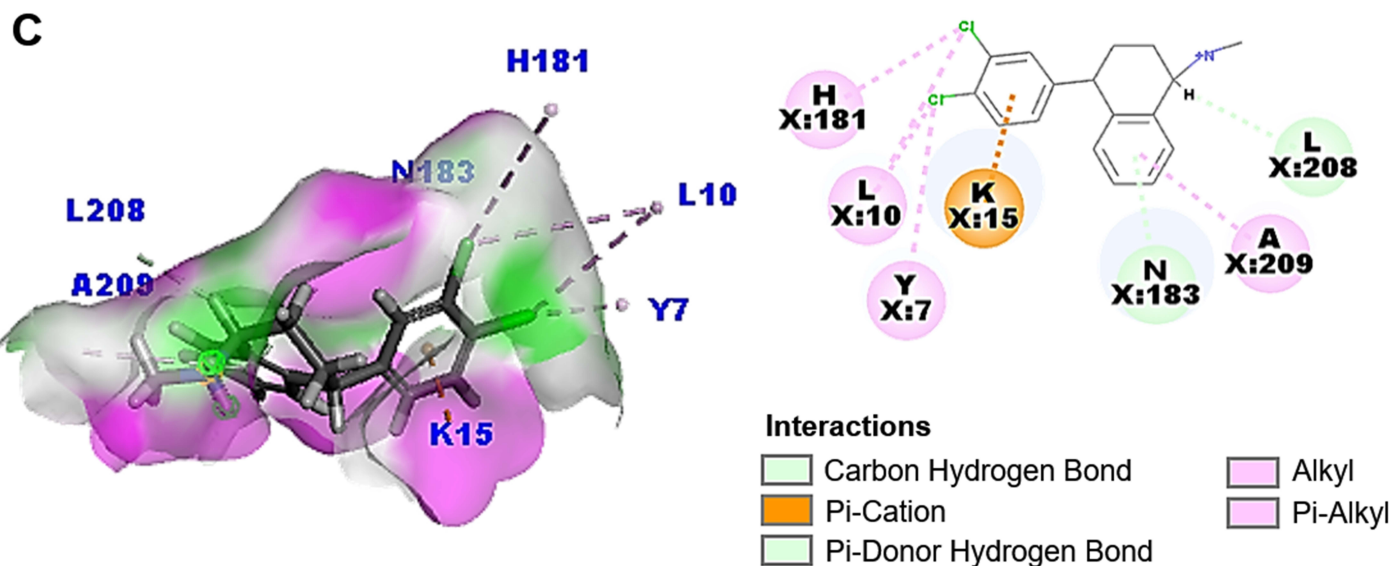

Supplement: Supplementary file 7 [file 31079772]
